# Supplementary material
Source: publisher figshare collection journal article supplement (https://tandf.figshare.com/articles/dataset/_/7798268)
Supplement: Supplementary file 1 [file 1]

Supplementary Table 2 Pairwise  $R_{st}$  values (lower part of table) and P values (upper part of the table) between Southern Slav populations from the Balkans performed using allele frequencies of available data for 23 Y STR loci (B&H - Bosnia and Herzegovina)

| Population<br>(entity)             | Central Balkan<br>(Serbian) | B&H<br>(Bosnian) | Tuzla, B&H<br>(Bosnian) | Croatia<br>(Croatian) | Zagreb, Croatia<br>(Croatian) | Macedonia<br>(Macedonian) | Ljubljana, Slovenia<br>(Slovenian) |
|------------------------------------|-----------------------------|------------------|-------------------------|-----------------------|-------------------------------|---------------------------|------------------------------------|
| Central Balkan<br>(Serbian)        | -                           | 0.187            | 0.034                   | 0.007                 | 0.038                         | 0.000                     | 0.000                              |
| B&H<br>(Bosnian)                   | 0.003                       | -                | 0.269                   | 0.037                 | 0.033                         | 0.000                     | 0.000                              |
| Tuzla, B&H<br>(Bosnian)            | 0.012                       | 0.002            | -                       | 0.123                 | 0.049                         | 0.000                     | 0.000                              |
| Croatia<br>(Croatian)              | 0.019                       | 0.016            | 0.007                   | -                     | 0.369                         | 0.000                     | 0.001                              |
| Zagreb, Croatia<br>(Croatian)      | 0.010                       | 0.017            | 0.014                   | 0.000                 | -                             | 0.000                     | 0.022                              |
| Macedonia<br>(Macedonian)          | 0.078                       | 0.115            | 0.120                   | 0.130                 | 0.092                         | -                         | 0.000                              |
| Ljubljana, Slovenia<br>(Slovenian) | 0.046                       | 0.076            | 0.073                   | 0.041                 | 0.018                         | 0.073                     | -                                  |
