# Supplementary material
Source: publisher figshare collection journal article supplement (https://tandf.figshare.com/articles/dataset/_/7798268)
Supplement: Supplementary file 2 [file 1]

Supplementary Table 1 Y-chromosome short tandem repeat haplotypes and haplogroups in the examined Serbian populations

| Haplo<br>type ID | DYS<br>393 | DYS<br>390 | DYS<br>19 | DYS<br>391 | DYS<br>385a | DYS<br>385b | DYS<br>439 | DYS<br>389 I | DYS<br>392 | DYS<br>389II | DYS<br>458 | DYS<br>437 | DYS<br>448 | GAT<br>AH4 | DYS<br>456 | DYS<br>576 | DYS<br>570 | DYS<br>438 | DYS<br>481 | DYS<br>549 | DYS<br>533 | DYS<br>635 | DYS<br>643 | haplotype<br>distribution | Haplogroup  |
|------------------|------------|------------|-----------|------------|-------------|-------------|------------|--------------|------------|--------------|------------|------------|------------|------------|------------|------------|------------|------------|------------|------------|------------|------------|------------|---------------------------|-------------|
| ID1              | 14         | 24.3       | 14        | 10         | 11          | 16          | 12         | 14           | 14         | 29           | 18         | 14         | 20         | 12         | 14         | 17         | 18         | 10         | 25         | 12         | 12         | 21         | 11         | 0,0066                    | N-P189.2    |
| ID2              | 12         | 24         | 14        | 11         | 11          | 14          | 12         | 13           | 13         | 29           | 15         | 15         | 19         | 12         | 16         | 19         | 17         | 12         | 21         | 13         | 12         | 23         | 10         | 0,0033                    | R1b-Z2103   |
| ID3              | 13         | 24         | 17        | 11         | 15          | 15          | 12         | 13           | 11         | 31           | 17         | 15         | 20         | 11         | 15         | 18         | 19         | 10         | 30         | 11         | 13         | 24         | 10         | 0,0033                    | I2-CTS10228 |
| ID4              | 13         | 24         | 16        | 10         | 14          | 15          | 15         | 13           | 11         | 30           | 17         | 15         | 19         | 11         | 15         | 17         | 17         | 10         | 30         | 11         | 12         | 23         | 10         | 0,0033                    | I2-PH908    |
| ID5              | 13         | 24         | 15        | 11         | 10          | 14          | 11         | 13           | 13         | 29           | 18         | 15         | 17         | 12         | 15         | 20         | 16         | 11         | 20         | 14         | 11         | 24         | 9          | 0,0033                    | R1b-P312    |
| ID6              | 13         | 24         | 16        | 11         | 14          | 14          | 13         | 14           | 11         | 33           | 16         | 15         | 21         | 11         | 15         | 17         | 20         | 10         | 28         | 11         | 12         | 23         | 10         | 0,0033                    | I2-CTS10228 |
| ID7              | 13         | 25         | 15        | 10         | 11          | 14          | 11         | 13           | 11         | 30           | 17         | 14         | 21         | 12         | 16         | 18         | 18         | 11         | 23         | 13         | 12         | 23         | 10         | 0,0066                    | R1a         |
| ID8              | 13         | 24         | 13        | 10         | 13          | 19          | 13         | 12           | 11         | 29           | 17.2       | 14         | 20         | 10         | 15         | 18         | 17         | 10         | 26         | 12         | 11         | 22         | 9          | 0,0033                    | J1-PF7263   |
| ID9              | 13         | 23         | 16        | 11         | 14          | 15          | 13         | 13           | 11         | 30           | 17         | 15         | 19         | 11         | 15         | 18         | 19         | 10         | 29         | 11         | 13         | 23         | 10         | 0,0033                    | I2-PH908    |
| ID10             | 13         | 24         | 16        | 11         | 14          | 15          | 13         | 13           | 11         | 31           | 17         | 15         | 19         | 11         | 15         | 18         | 18         | 10         | 31         | 12         | 13         | 22.3       | 10         | 0,0033                    | I2-PH908    |
| ID11             | 13         | 24         | 16        | 11         | 14          | 15          | 13         | ?            | 11         | 30           | 18         | 15         | 19         | 11         | 15         | 17         | 20         | 10         | 29         | 11         | 13         | 23         | 10         | 0,0033                    | I2-PH908    |
| ID12             | 13         | 24         | 16        | 11         | 14          | 14          | 13         | 13           | 11         | 32           | 18         | 15         | 21         | 11         | 15         | 18         | 19         | 10         | 29         | 11         | 12         | 23         | 10         | 0,0033                    | I2-CTS10228 |
| ID13             | 13         | 24         | 16        | 10         | 14          | 15          | 10         | 13           | 11         | 31           | 17         | 15         | 19         | 11         | 15         | 18         | 18         | 10         | 30         | 11         | 12         | 21         | 10         | 0,0033                    | I2-PH908    |
| ID14             | 13         | 24         | 16        | 11         | 14          | 15          | 12         | 13           | 11         | 31           | 17         | 15         | 19         | 11         | 15         | 18         | 18         | 10         | 30         | 11         | 12         | 23         | 10         | 0,0033                    | I2-PH908    |
| ID15             | 13         | 24         | 16        | 11         | 14          | 15          | 12         | 13           | 11         | 31           | 16         | 15         | 19         | 11         | 15         | 18         | 18         | 10         | 30         | 11         | 12         | 23         | 9          | 0,0033                    | I2-PH908    |
| ID16             | 13         | 24         | 16        | 11         | 14          | 15          | 13         | 13           | 11         | 30           | 18         | 15         | 19         | 11         | 15         | 17         | 19         | 10         | 31         | 11         | 13         | 22         | 10         | 0,0033                    | I2-PH908    |
| ID17             | 13         | 24         | 16        | 10         | 14          | 15          | 13         | 13           | 11         | 30           | 19         | 15         | 19         | ?          | 15         | 19         | 19         | 10         | 30         | 11         | 12         | 22         | 10         | 0,0033                    | I2-PH908    |
| ID18             | 13         | 24         | 15        | 11         | 10          | 14          | 11         | 13           | 13         | 29           | 18         | 14         | 17         | 12         | 16         | 20         | 17         | 11         | 20         | 14         | 12         | 23         | 9          | 0,0033                    | R1b         |
| ID19             | 13         | 24         | 13        | 10         | 16          | 17          | 12         | 13           | 11         | 30           | 15         | 14         | 19         | 11         | 17         | 17         | 21         | 10         | 22         | 13         | 12         | 22         | 11         | 0,0033                    | E-V13       |
| ID20             | 13         | 24         | 17        | 11         | 14          | 15          | 13         | 13           | 11         | 29           | 17         | 15         | 19         | 11         | 15         | 19         | 17         | 10         | 30         | 11         | 12         | 23         | 10         | 0,0033                    | I2-PH908    |
| ID21             | 13         | 25         | 17        | 11         | 11          | 14          | 10         | 13           | 11         | 29           | 13         | 14         | 20         | 13         | 15         | 18         | 19         | 11         | 24         | 12         | 12         | 23         | 10         | 0,0033                    | R1a-YP4278  |
| ID22             | 13         | 23         | 16        | 11         | 13          | 15          | 12         | 13           | 11         | 30           | 17         | 15         | 20         | 11         | 15         | 18         | 18         | 10         | 30         | 11         | 13         | 23         | 10         | 0,0033                    | I2-CTS10228 |
| ID23             | 13         | 24         | 15        | 11         | 14          | 15          | 13         | 13           | 11         | 31           | 17         | 15         | 19         | 11         | 15         | 18         | 18         | 10         | 29         | 11         | 12         | 23         | 10         | 0,0033                    | I2-PH908    |
| ID24             | 13         | 24         | 13        | 10         | 16          | 17          | 12         | 13           | 11         | 30           | 15         | 14         | 20         | 11         | 17         | 16         | 21         | 10         | 22         | 13         | 12         | 22         | 11         | 0,0033                    | E-V13       |
| ID25             | 13         | 24         | 15        | 11         | 14          | 14          | 13         | 13           | 11         | 32           | 17         | 15         | 21         | 11         | 15         | 17         | 19         | 10         | 27         | 11         | 12         | 23         | 10         | 0,0033                    | I2-CTS10228 |
| ID26             | 13         | 24         | 16        | 11         | 14          | 15          | 13         | 13           | 11         | 31           | 16         | 15         | 19         | 11         | 15         | 18         | 18         | 10         | 29         | 11         | 12         | 23         | 9          | 0,0033                    | I2-PH908    |
| ID27             | 13         | 24         | 16        | 11         | 14          | 14          | 12         | 13           | 11         | 32           | 18         | 15         | 21         | 11         | 15         | 16         | 18         | 10         | 30         | 11         | 12         | 23         | 10         | 0,0033                    | I2-CTS10228 |
| ID28             | 14         | 25         | 16        | 10         | 11          | 14          | 11         | 13           | 11         | 29           | 15         | 14         | 20         | 11         | 17         | 17         | 18         | 11         | 25         | 12         | 11         | 23         | 10         | 0,0033                    | R1a-M458    |

|      |    |      |    |    |    |    |    |    |    |    |      |    |    |    |    |    |    |    |    |    |    |    |    |        |             |
|------|----|------|----|----|----|----|----|----|----|----|------|----|----|----|----|----|----|----|----|----|----|----|----|--------|-------------|
| ID29 | 13 | 24   | 16 | 11 | 14 | 15 | 14 | 13 | 11 | 31 | 18   | 15 | 19 | 11 | 15 | 18 | 18 | 10 | 32 | 11 | 12 | 23 | 10 | 0,0033 | I2-PH908    |
| ID30 | 13 | 24   | 16 | 11 | 15 | 15 | 13 | 13 | 11 | 30 | 17   | 15 | 19 | 11 | 15 | 17 | 19 | 10 | 31 | 11 | 13 | 22 | 10 | 0,0033 | I2-PH908    |
| ID31 | 13 | 24   | 16 | 11 | 14 | 15 | 14 | 14 | 11 | 31 | 18   | 15 | 19 | 11 | 15 | 18 | 18 | 10 | 30 | 11 | 13 | 23 | 10 | 0,0033 | I2-PH908    |
| ID32 | 13 | 24   | 13 | 10 | 16 | 18 | 12 | 13 | 11 | 30 | 17   | 14 | 20 | 12 | 17 | 18 | 21 | 10 | 22 | 12 | 12 | 22 | 12 | 0,0033 | E-V13       |
| ID33 | 13 | 25   | 17 | 11 | 11 | 14 | 10 | 13 | 11 | 29 | 13   | 14 | 20 | 12 | 16 | 19 | 16 | 11 | 24 | 13 | 12 | 23 | 10 | 0,0033 | R1a-YP4278  |
| ID34 | 13 | 25   | 17 | 11 | 11 | 14 | 11 | 13 | 11 | 29 | 13   | 14 | 20 | 12 | 16 | 19 | 18 | 11 | 24 | 13 | 12 | 23 | 10 | 0,0033 | R1a-YP4278  |
| ID35 | 13 | 25   | 13 | 10 | 16 | 19 | 11 | 13 | 11 | 30 | 15   | 14 | 20 | 12 | 17 | 17 | 19 | 10 | 22 | 12 | 12 | 23 | 12 | 0,0033 | E-V13       |
| ID36 | 13 | 25   | 15 | 11 | 14 | 15 | 13 | 13 | 11 | 31 | 17   | 15 | 19 | 11 | 15 | 19 | 18 | 10 | 31 | 11 | 12 | 23 | 10 | 0,0033 | I2-PH908    |
| ID37 | 13 | 24   | 16 | 11 | 14 | 15 | 12 | 14 | 11 | 32 | 17   | 15 | 19 | 11 | 15 | 18 | 18 | 10 | 31 | 11 | 13 | 23 | 11 | 0,0033 | I2-PH908    |
| ID38 | 13 | 24   | 13 | 10 | 16 | 18 | 12 | 13 | 11 | 30 | 19   | 14 | 20 | 13 | 17 | 17 | 19 | 10 | 23 | 12 | 12 | 21 | 12 | 0,0033 | E-V13       |
| ID39 | 14 | 24.3 | 14 | 10 | 11 | 16 | 12 | 14 | 14 | 29 | 18   | 14 | 20 | 12 | 14 | 17 | 18 | 10 | 24 | 12 | 12 | 21 | 11 | 0,0099 | N-P189.2    |
| ID40 | 13 | 23   | 17 | 13 | 12 | 14 | 10 | 13 | 11 | 30 | 15   | 14 | 20 | 13 | 16 | 20 | 19 | 12 | 23 | 12 | 13 | 23 | 10 | 0,0033 | R1a         |
| ID41 | 13 | 24   | 17 | 10 | 14 | 15 | 13 | 13 | 11 | 31 | 17   | 15 | 19 | 11 | 15 | 17 | 18 | 10 | 30 | 11 | 11 | 23 | 10 | 0,0033 | I2-PH908    |
| ID42 | 13 | 23   | 17 | 11 | 14 | 15 | 12 | 13 | 11 | 30 | 18   | 15 | 20 | 11 | 16 | 18 | 18 | 10 | 29 | 11 | 13 | 23 | 10 | 0,0033 | I2-CTS10228 |
| ID43 | 13 | 24   | 17 | 11 | 14 | 15 | 12 | 13 | 11 | 31 | 17   | 15 | 19 | 11 | 15 | 17 | 17 | 10 | 30 | 11 | 14 | 22 | 10 | 0,0033 | I2-PH908    |
| ID44 | 13 | 24   | 15 | 11 | 14 | 15 | 13 | 13 | 11 | 31 | 17   | 15 | 19 | 11 | 15 | 18 | 18 | 10 | 31 | 11 | 12 | 23 | 10 | 0,0033 | I2-PH908    |
| ID45 | 13 | 24   | 16 | 11 | 14 | 15 | 13 | 13 | 11 | 31 | 18   | 15 | 19 | 11 | 15 | 18 | 18 | 10 | 31 | 11 | 12 | 23 | 10 | 0,0033 | I2-PH908    |
| ID46 | 12 | 22   | 14 | 10 | 14 | 16 | 11 | 13 | 11 | 29 | 15   | 14 | 21 | 12 | 15 | 17 | 18 | 10 | 23 | 14 | 12 | 22 | 8  | 0,0033 | J2a-M92     |
| ID47 | 13 | 25   | 16 | 11 | 11 | 12 | 11 | 13 | 11 | 29 | 15   | 14 | 20 | 12 | 16 | 18 | 19 | 11 | 26 | 12 | 13 | 23 | 11 | 0,0066 | R1a         |
| ID48 | 13 | 24   | 15 | 11 | 10 | 14 | 11 | 13 | 13 | 29 | 18   | 15 | 17 | 12 | 16 | 20 | 17 | 11 | 19 | 14 | 12 | 23 | 9  | 0,0033 | R1b         |
| ID49 | 13 | 24   | ?  | 11 | 16 | 18 | 12 | 13 | 11 | 30 | 15   | 14 | 20 | 13 | 17 | 17 | 19 | 10 | 23 | 14 | 12 | 21 | 12 | 0,0033 | E-V13       |
| ID50 | 13 | 25   | 13 | 10 | 16 | 18 | 11 | 13 | 11 | 30 | 15   | 14 | 20 | 12 | 16 | 17 | 19 | 10 | 22 | 12 | 12 | 23 | 12 | 0,0033 | E-V13       |
| ID51 | 12 | 22   | 14 | 10 | 14 | 14 | 11 | 13 | 11 | 29 | 15   | 14 | 21 | 12 | 15 | 18 | 17 | 10 | 23 | 13 | 12 | 22 | 8  | 0,0033 | J2a-M92     |
| ID52 | 12 | 24   | 14 | 11 | 12 | 13 | 12 | 14 | 13 | 31 | 16   | 15 | 20 | 11 | 16 | 17 | 18 | 10 | 22 | 12 | 12 | 24 | 10 | 0,0033 | R1b         |
| ID53 | 13 | 24   | 17 | 10 | 14 | 15 | 12 | 13 | 11 | 31 | 18   | 14 | 19 | 11 | 15 | 18 | 18 | 10 | 30 | 11 | 13 | 22 | 11 | 0,0033 | I2-PH908    |
| ID54 | 13 | 25   | 16 | 10 | 11 | 14 | 11 | 12 | 11 | 29 | 17   | 14 | 20 | 12 | 16 | 21 | 19 | 12 | 25 | 12 | 13 | 23 | 10 | 0,0033 | R1a-M458    |
| ID55 | 13 | 24   | 17 | 10 | 15 | 15 | 12 | 13 | 11 | 31 | 18   | 14 | 19 | 11 | 15 | 18 | 18 | 10 | 30 | 11 | 13 | 23 | 11 | 0,0033 | I2-PH908    |
| ID56 | 13 | 24   | 16 | 11 | 14 | 15 | 13 | 13 | 11 | 31 | 18   | 15 | 19 | 11 | 15 | 18 | 18 | 10 | 31 | 11 | 13 | 23 | 10 | 0,0033 | I2-PH908    |
| ID57 | 13 | 24   | 16 | 11 | 13 | 15 | 13 | 13 | 11 | 31 | 18   | 15 | 19 | 11 | 16 | 19 | 18 | 10 | 29 | 11 | 12 | 23 | 10 | 0,0033 | I2-PH908    |
| ID58 | 12 | 23   | 14 | 10 | 13 | 17 | 13 | 13 | 11 | 30 | 20.2 | 14 | 20 | 11 | 15 | 17 | 18 | 10 | 26 | 12 | 12 | 20 | 9  | 0,0033 | J1          |
| ID59 | 14 | 23   | 15 | 10 | 14 | 19 | 11 | 13 | 14 | 30 | 17   | 14 | 19 | 12 | 15 | 17 | 16 | 11 | 26 | 12 | 12 | 22 | 10 | 0,0033 | Q           |
| ID60 | 13 | 24   | 16 | 10 | 15 | 15 | 13 | 13 | 11 | 31 | 17   | 15 | 20 | 11 | 15 | 17 | 18 | 10 | 30 | 11 | 13 | 23 | 10 | 0,0033 | I2-CTS10228 |
| ID61 | 13 | 25   | 16 | 10 | 11 | 14 | 11 | 13 | 11 | 29 | 16   | 14 | 20 | 12 | 16 | 19 | 19 | 11 | 25 | 12 | 12 | 23 | 10 | 0,0033 | R1a         |

|      |    |      |    |    |    |    |    |    |    |    |      |    |    |    |    |    |    |    |    |    |    |    |    |        |             |
|------|----|------|----|----|----|----|----|----|----|----|------|----|----|----|----|----|----|----|----|----|----|----|----|--------|-------------|
| ID62 | 14 | 24   | 16 | 11 | 14 | 15 | 13 | 14 | 11 | 32 | 18   | 15 | 19 | 11 | 15 | 18 | 19 | 10 | 32 | 11 | 12 | 23 | 10 | 0,0033 | I2-PH908    |
| ID63 | 13 | 24   | 16 | 11 | 14 | 15 | 13 | 12 | 11 | 30 | 16   | 15 | 19 | 11 | 15 | 16 | 18 | 10 | 30 | 11 | 13 | 24 | 10 | 0,0033 | I2-PH908    |
| ID64 | 13 | 24   | 16 | 10 | 14 | 15 | 14 | 13 | 12 | 31 | 17   | 15 | 19 | 11 | 16 | 16 | 17 | 10 | 31 | 11 | 12 | 24 | 10 | 0,0033 | I2-PH908    |
| ID65 | 13 | 26   | 17 | 11 | 11 | 14 | 10 | 13 | 11 | 29 | 14   | 14 | 20 | 12 | 16 | 19 | 18 | 11 | 24 | 13 | 12 | 23 | 10 | 0,0033 | R1a         |
| ID66 | 13 | 22   | 15 | 10 | 13 | 14 | 11 | 12 | 12 | 28 | 16   | 16 | 20 | 11 | 14 | 16 | 19 | 10 | 27 | 12 | 11 | 22 | 12 | 0,0033 | I1          |
| ID67 | 13 | 24   | 13 | 10 | 13 | 19 | 11 | 12 | 11 | 29 | 17.2 | 14 | 20 | 11 | 15 | 19 | 17 | 10 | 26 | 13 | 11 | 22 | 9  | 0,0033 | J1-PF7263   |
| ID68 | 13 | 25   | 15 | 10 | 11 | 14 | 11 | 13 | 11 | 30 | 17   | 14 | 21 | 12 | 16 | 18 | 18 | 11 | 23 | 13 | 13 | 23 | 10 | 0,0033 | R1a         |
| ID69 | 13 | 22   | 15 | 10 | 14 | 14 | 12 | 12 | 11 | 30 | 16   | 16 | 21 | 11 | 15 | 15 | 19 | 10 | 21 | 11 | 9  | 20 | 12 | 0,0033 | G2a-L497    |
| ID70 | 13 | 24   | 16 | 11 | 14 | 15 | 12 | 13 | 11 | 31 | 17   | 15 | 20 | 11 | 15 | 18 | 18 | 10 | 30 | 11 | 12 | 23 | 10 | 0,0099 | I2a1b3      |
| ID71 | 13 | 25   | 13 | 10 | 16 | 18 | 11 | 13 | 11 | 30 | 15   | 14 | 20 | 12 | 17 | 17 | 19 | 10 | 22 | 12 | 12 | 23 | 12 | 0,0033 | E-V13       |
| ID72 | 13 | 25   | 13 | 10 | 16 | 18 | 11 | 13 | 11 | 30 | 15   | 14 | 20 | 12 | 17 | 17 | 19 | 10 | 22 | 12 | 12 | 24 | 12 | 0,0066 | E-V13       |
| ID73 | 13 | 26   | 17 | 10 | 11 | 15 | 10 | 13 | 11 | 30 | 13   | 14 | 20 | 13 | 15 | 18 | 19 | 11 | 24 | 12 | 12 | 23 | 10 | 0,0033 | R1a         |
| ID74 | 12 | 22   | 14 | 10 | 14 | 16 | 11 | 13 | 11 | 29 | 15   | 14 | 21 | 12 | 15 | 17 | 18 | 10 | 23 | 13 | 12 | 22 | 8  | 0,0033 | J2a-M92     |
| ID75 | 12 | 22   | 14 | 10 | 14 | 14 | 11 | 13 | 11 | 29 | 15   | 14 | 21 | 12 | 15 | 18 | 18 | 10 | 23 | 13 | 12 | 23 | 8  | 0,0033 | J2a-M92     |
| ID76 | 13 | 25   | 16 | 10 | 11 | 14 | 11 | 13 | 11 | 29 | 17   | 14 | 20 | 12 | 17 | 18 | 18 | 11 | 25 | 12 | 11 | 23 | 10 | 0,0033 | R1a-M458    |
| ID77 | 13 | 24   | 18 | 10 | 14 | 15 | 12 | 13 | 11 | 31 | 18   | 14 | 19 | 11 | 15 | 18 | 18 | 10 | 30 | 11 | 13 | 23 | 11 | 0,0033 | I2-PH908    |
| ID78 | 14 | 23   | 14 | 10 | 13 | 14 | 11 | 12 | 11 | 28 | 15   | 17 | 20 | 12 | 14 | 17 | 22 | 10 | 25 | 11 | 11 | 22 | 11 | 0,0033 | I1-P109     |
| ID79 | 13 | 24   | 16 | 11 | 14 | 14 | 13 | 13 | 11 | 32 | 18   | 15 | 21 | 11 | 14 | 16 | 18 | 10 | 30 | 11 | 12 | 23 | 10 | 0,0033 | I2-CTS10228 |
| ID80 | 13 | 25   | 15 | 11 | 11 | 14 | 10 | 13 | 11 | 29 | 13   | 14 | 20 | 12 | 16 | 19 | 18 | 11 | 24 | 13 | 12 | 23 | 10 | 0,0033 | R1a-YP4278  |
| ID81 | 13 | 24   | 14 | 11 | 14 | 15 | 14 | 13 | 11 | 31 | 17   | 15 | 19 | 12 | 15 | 18 | 18 | 10 | 31 | 11 | 13 | 22 | 10 | 0,0033 | I2-PH908    |
| ID82 | 14 | 24.3 | 14 | 10 | 11 | 16 | 12 | 14 | 14 | 29 | 17   | 14 | 20 | 12 | 14 | 17 | 18 | 10 | 24 | 12 | 12 | 21 | 11 | 0,0033 | N-P189.2    |
| ID83 | 13 | 25   | 16 | 11 | 14 | 15 | 12 | 13 | 11 | 31 | 18   | 15 | 19 | 11 | 15 | 19 | 18 | 10 | 31 | 11 | 12 | 23 | 10 | 0,0033 | I2-PH908    |
| ID84 | 13 | 24   | 17 | 10 | 14 | 15 | 12 | 13 | 11 | 31 | 18   | 14 | 19 | 11 | 15 | 18 | 18 | 10 | 30 | 11 | 13 | 23 | 11 | 0,0033 | I2-PH908    |
| ID85 | 13 | 25   | 16 | 11 | 11 | 12 | 11 | 13 | 11 | 30 | 15   | 14 | 20 | 12 | 16 | 18 | 19 | 11 | 24 | 12 | 13 | 23 | 11 | 0,0033 | R1a         |
| ID86 | 13 | 23   | 15 | 10 | 13 | 14 | 11 | 12 | 11 | 28 | 15   | 17 | 20 | 12 | 13 | 18 | 20 | 10 | 25 | 12 | 11 | 22 | 11 | 0,0033 | I1-P109     |
| ID87 | 13 | 24   | 16 | 10 | 15 | 15 | 13 | 13 | 11 | 31 | 17   | 15 | 20 | 11 | 15 | 18 | 18 | 10 | 30 | 11 | 13 | 22 | 10 | 0,0033 | I2-CTS10228 |
| ID88 | 13 | 24   | 13 | 10 | 16 | 18 | 11 | 14 | 11 | 30 | 15   | 14 | 20 | 12 | 17 | 20 | 19 | 10 | 22 | 12 | 12 | 22 | 12 | 0,0033 | E-V13       |
| ID89 | 13 | 24   | 13 | 10 | 16 | 17 | 12 | 13 | 11 | 30 | 15   | 14 | 20 | 11 | 17 | 16 | 21 | 10 | 22 | 13 | 12 | 21 | 11 | 0,0033 | E-V13       |
| ID90 | 13 | 22   | 15 | 10 | 14 | 14 | 12 | 12 | 11 | 29 | 17   | 16 | 21 | 11 | 15 | 16 | 19 | 10 | 21 | 11 | 9  | 20 | 12 | 0,0033 | G2a-L497    |
| ID91 | 13 | 24   | 17 | 11 | 14 | 16 | 13 | 13 | 11 | 32 | 17   | 15 | 20 | 11 | 15 | 18 | 19 | 10 | 29 | 11 | 13 | 20 | 10 | 0,0033 | I2-CTS10228 |
| ID92 | 13 | 24   | 13 | 10 | 16 | 17 | 12 | 13 | 11 | 31 | 17   | 14 | 20 | 12 | 16 | 20 | 19 | 10 | 23 | 12 | 13 | 22 | 12 | 0,0033 | E-V13       |
| ID93 | 13 | 23   | 14 | 10 | 13 | 14 | 11 | 12 | 11 | 28 | 15   | 17 | 20 | 12 | 14 | 18 | 21 | 10 | 25 | 12 | 11 | 22 | 11 | 0,0033 | I1-P109     |
| ID94 | 13 | 23   | 16 | 11 | 15 | 15 | 13 | 13 | 11 | 33 | 17   | 15 | 19 | 11 | 15 | 17 | 18 | 11 | 31 | 11 | 12 | 23 | 10 | 0,0033 | I2-PH908    |

|       |    |      |    |    |    |    |    |    |    |    |      |    |    |    |    |    |    |    |    |    |    |    |    |        |           |
|-------|----|------|----|----|----|----|----|----|----|----|------|----|----|----|----|----|----|----|----|----|----|----|----|--------|-----------|
| ID95  | 13 | 24   | 14 | 11 | 11 | 14 | 11 | 13 | 13 | ?  | 15   | 14 | 19 | 12 | 16 | 16 | 17 | 12 | 23 | 13 | 12 | 23 | 10 | 0,0033 | R1b       |
| ID96  | 13 | 24   | 17 | 11 | 14 | 15 | 13 | 13 | 11 | 30 | 17   | 15 | 20 | 11 | 16 | 17 | 21 | 10 | 28 | 11 | 12 | 22 | 11 | 0,0033 | I2a1b3    |
| ID97  | 13 | 25   | 16 | 10 | 11 | 14 | 10 | 13 | 11 | 29 | 15   | 14 | 20 | 12 | 15 | 18 | 19 | 11 | 24 | 12 | 12 | 24 | 10 | 0,0033 | R1a       |
| ID98  | 13 | 25   | 13 | 10 | 16 | 18 | 12 | 13 | 11 | 30 | 14   | 14 | 20 | 12 | 15 | 17 | 19 | 10 | 22 | 12 | 12 | 21 | 13 | 0,0033 | E-V13     |
| ID99  | 13 | 23   | 14 | 10 | 13 | 18 | 12 | 14 | 11 | 30 | 20.2 | 14 | 22 | 11 | 16 | 17 | 18 | 10 | 27 | 12 | 11 | 22 | 9  | 0,0033 | J1        |
| ID100 | 13 | 23   | 14 | 10 | 13 | 18 | 12 | 14 | 11 | 30 | 20.2 | 14 | 22 | 11 | 15 | 17 | 18 | 10 | 27 | 12 | 11 | 22 | 9  | 0,0033 | J1        |
| ID101 | 13 | 24   | 16 | 11 | 14 | 15 | 12 | 13 | 11 | 31 | 17   | 15 | 19 | 11 | 15 | 17 | 19 | 10 | 30 | 11 | 12 | 23 | 10 | 0,0033 | I2-PH908  |
| ID102 | 13 | 24   | 15 | 11 | 14 | 15 | 12 | 13 | 11 | 32 | 17   | 14 | 19 | 11 | 15 | 18 | 18 | 10 | 30 | 11 | 13 | 22 | 10 | 0,0033 | I2-PH908  |
| ID103 | 13 | 25   | 16 | 11 | 11 | 14 | 10 | 13 | 11 | 30 | 15   | 14 | 20 | 12 | 15 | 16 | 20 | 11 | 24 | 13 | 12 | 23 | 11 | 0,0033 | R1a       |
| ID104 | 13 | 24   | 13 | 10 | 16 | 18 | 12 | 13 | 11 | 30 | 15   | 14 | 19 | 12 | 15 | 17 | 22 | 10 | 22 | 11 | 12 | 22 | 14 | 0,0033 | E-V13     |
| ID105 | 13 | 24   | 17 | 11 | 14 | 15 | 13 | 13 | 11 | 31 | 17   | 15 | 20 | 11 | 15 | 18 | 21 | 10 | 29 | 11 | 12 | 23 | 11 | 0,0033 | I2a1b3    |
| ID106 | 13 | 24   | 13 | 10 | 13 | 19 | 13 | 12 | 11 | 29 | 17.2 | 14 | 20 | 10 | 15 | 18 | 17 | 10 | 27 | 12 | 11 | 22 | 9  | 0,0033 | J1-PF7263 |
| ID107 | 13 | 25   | 15 | 10 | 11 | 14 | 10 | 13 | 11 | 30 | 15   | 14 | 20 | 13 | 17 | 18 | 17 | 11 | 21 | 12 | 12 | 23 | 10 | 0,0033 | R1a       |
| ID108 | 13 | 23   | 14 | 10 | 13 | 14 | 11 | 12 | 11 | 28 | 15   | 16 | 20 | 12 | 14 | 17 | 21 | 10 | 25 | 12 | 12 | 22 | 11 | 0,0033 | I1-P109   |
| ID109 | 13 | 25   | 16 | 11 | 11 | 14 | 10 | 13 | 11 | 29 | 15   | 14 | 20 | 12 | 16 | 17 | 19 | 11 | 23 | 12 | 12 | 23 | 11 | 0,0033 | R1a       |
| ID110 | 13 | 22   | 15 | 10 | 14 | 14 | 12 | 12 | 11 | 29 | 16   | 16 | 21 | 10 | 15 | 15 | 18 | 10 | 21 | 12 | 9  | 20 | 12 | 0,0033 | G2a-L497  |
| ID111 | 13 | 24   | 13 | 10 | 16 | 18 | 12 | 13 | 11 | 30 | 15   | 14 | 19 | 12 | 15 | 17 | 21 | 10 | 22 | 11 | 12 | 22 | 14 | 0,0033 | E-V13     |
| ID112 | 13 | 24.3 | 14 | 10 | 11 | 16 | 12 | 14 | 14 | 29 | 17   | 14 | 20 | 12 | 14 | 18 | 18 | 10 | 24 | 12 | 12 | 21 | 11 | 0,0033 | N-P189.2  |
| ID113 | 13 | 23   | 14 | 10 | 13 | 14 | 11 | 12 | 11 | 28 | 15   | 16 | 20 | 12 | 14 | 17 | 21 | 11 | 25 | 12 | 11 | 21 | 11 | 0,0033 | I1-P109   |
| ID114 | 13 | 23   | 15 | 10 | 13 | 14 | 11 | 12 | 11 | 29 | 18   | 16 | 20 | 12 | 14 | 18 | 20 | 10 | 28 | 13 | 11 | 21 | 11 | 0,0033 | I1-Z63    |
| ID115 | 14 | 23   | 14 | 10 | 13 | 17 | 11 | 13 | 11 | 29 | 14   | 15 | 21 | 11 | 14 | 16 | 15 | 9  | 22 | 12 | 12 | 23 | 9  | 0,0033 | J2-Z6055  |
| ID116 | 13 | 23   | 14 | 10 | 13 | 14 | 11 | 12 | 11 | 28 | 15   | 17 | 20 | 11 | 14 | 17 | 21 | 10 | 25 | 12 | 11 | 22 | 11 | 0,0033 | I1-P109   |
| ID117 | 13 | 23   | 15 | 11 | 14 | 15 | 13 | 13 | 11 | 32 | 17   | 14 | 20 | 11 | 15 | 17 | 18 | 10 | 29 | 11 | 13 | 23 | 10 | 0,0033 | I2a1b3    |
| ID118 | 13 | 23   | 14 | 10 | 13 | 14 | 11 | 12 | 11 | 28 | 15   | 16 | 20 | 12 | 14 | 17 | 21 | 10 | 25 | 12 | 11 | 22 | 11 | 0,0099 | I1-P109   |
| ID119 | 13 | 24   | 16 | 11 | 14 | 15 | 12 | 13 | 11 | 30 | 18   | 13 | 19 | 9  | 15 | 17 | 19 | 10 | 31 | 11 | 12 | 23 | 10 | 0,0033 | I2-PH908  |
| ID120 | 13 | 25   | 15 | 10 | 12 | 14 | 10 | 13 | 11 | 29 | 16   | 14 | 20 | 12 | 15 | 18 | 18 | 11 | 23 | 12 | 12 | 23 | 10 | 0,0033 | R1a-M458  |
| ID121 | 13 | 24   | 15 | 12 | 14 | 16 | 13 | 13 | 11 | 31 | 16   | 15 | 20 | 11 | 15 | 18 | 19 | 10 | 30 | 11 | 11 | 23 | 10 | 0,0033 | I2a1b3    |
| ID122 | 13 | 24   | 16 | 11 | 13 | 15 | 12 | 13 | 11 | 31 | 17   | 15 | 18 | 11 | 15 | 18 | 18 | 10 | 30 | 11 | 13 | 23 | 10 | 0,0033 | I2-PH908  |
| ID123 | 13 | 24   | 15 | 11 | 14 | 15 | 13 | 13 | 11 | 32 | 17   | 15 | 19 | 11 | 15 | 18 | 15 | 10 | 32 | 11 | 13 | 23 | 10 | 0,0033 | I2-PH908  |
| ID124 | 12 | 24   | 14 | 10 | 13 | 16 | 10 | 13 | 11 | 29 | 16   | 14 | 20 | 12 | 15 | 19 | 17 | 9  | 25 | 12 | 11 | 21 | 10 | 0,0033 | J2a-M67   |
| ID125 | 13 | 24   | 16 | 12 | 14 | 15 | 13 | 13 | 11 | 30 | 17   | 15 | 19 | 11 | 15 | 16 | 18 | 10 | 31 | 11 | 13 | 23 | 10 | 0,0033 | I2-PH908  |
| ID126 | 13 | 24   | 17 | 11 | 15 | 15 | 12 | 13 | 11 | 30 | 17   | 15 | 20 | 11 | 15 | 19 | 18 | 10 | 29 | 11 | 13 | 22 | 10 | 0,0033 | I2a1b3    |
| ID127 | 12 | 23   | 15 | 10 | 15 | 17 | 12 | 12 | 12 | 28 | 15   | 14 | 19 | 12 | 14 | 19 | 18 | 9  | 23 | 12 | 11 | 21 | 9  | 0,0033 | J2b-M205  |

|       |    |    |    |    |    |    |    |    |    |    |      |    |    |    |    |    |    |    |    |    |    |    |    |        |             |
|-------|----|----|----|----|----|----|----|----|----|----|------|----|----|----|----|----|----|----|----|----|----|----|----|--------|-------------|
| ID128 | 13 | 25 | 17 | 12 | 11 | 14 | 11 | 12 | 11 | 28 | 13   | 14 | 20 | 12 | 16 | 19 | 18 | 11 | 24 | 13 | 12 | 23 | 10 | 0,0033 | R1a         |
| ID129 | 13 | 22 | 13 | 10 | 14 | 17 | 13 | 13 | 15 | 29 | 19   | 15 | 19 | 10 | 15 | 18 | 16 | 11 | 24 | 12 | 11 | 22 | 12 | 0,0033 | Q-L245      |
| ID130 | 12 | 23 | 15 | 10 | 16 | 19 | 12 | 12 | 12 | 29 | 16   | 14 | 19 | 12 | 14 | 18 | 18 | 9  | 23 | 12 | 11 | 21 | 9  | 0,0033 | J2b-M205    |
| ID131 | 14 | 24 | 16 | 11 | 14 | 15 | 12 | 13 | 11 | 31 | 17   | 15 | 19 | 11 | 15 | 18 | 18 | 10 | 29 | 11 | 12 | 24 | 10 | 0,0033 | I2-PH908    |
| ID132 | 12 | 23 | 15 | 10 | 15 | 19 | 12 | 12 | 12 | 28 | 16   | 14 | 19 | 12 | 14 | 19 | 18 | 9  | 23 | 12 | 11 | 21 | 9  | 0,0033 | J2b-M205    |
| ID133 | 13 | 25 | 16 | 11 | 12 | 14 | 10 | 13 | 11 | 30 | 17   | 14 | 20 | 13 | 15 | 17 | 19 | 11 | 23 | 12 | 12 | 23 | 10 | 0,0033 | R1a         |
| ID134 | 14 | 23 | 16 | 10 | 14 | 15 | 14 | 13 | 11 | 31 | 16   | 15 | 19 | 11 | 15 | 19 | 18 | 10 | 31 | 11 | 12 | 24 | 10 | 0,0033 | I2-PH908    |
| ID135 | 13 | 23 | 15 | 10 | 15 | 18 | 12 | 12 | 12 | 28 | 15   | 14 | 19 | 12 | 14 | 19 | 18 | 9  | 23 | 13 | 11 | 21 | 9  | 0,0033 | J2b-M205    |
| ID136 | 13 | 25 | 16 | 11 | 11 | 14 | 11 | 13 | 11 | 30 | 15   | 14 | 20 | 13 | 15 | 18 | 17 | 12 | 23 | 12 | 12 | 23 | 10 | 0,0033 | R1a         |
| ID137 | 13 | 24 | 16 | 10 | 14 | 15 | 13 | 13 | 11 | 31 | 16   | 15 | 19 | 11 | 15 | 18 | 18 | 10 | 31 | 11 | 13 | 22 | 10 | 0,0033 | I2-PH908    |
| ID138 | 13 | 25 | 16 | 10 | 11 | 14 | 10 | 13 | 11 | 31 | 16   | 14 | 20 | 12 | 17 | 19 | 20 | 11 | 20 | 12 | 12 | 23 | 10 | 0,0033 | R1a-Y2613   |
| ID139 | 13 | 23 | 14 | 10 | 13 | 16 | 11 | 12 | 11 | 28 | 15   | 16 | 20 | 12 | 14 | 17 | 21 | 10 | 25 | 13 | 11 | 23 | 11 | 0,0033 | I1-P109     |
| ID140 | 13 | 24 | 13 | 10 | 18 | 19 | 12 | 13 | 11 | 30 | 14   | 14 | 20 | 13 | 15 | 19 | 19 | 10 | 22 | 12 | 12 | 21 | 11 | 0,0033 | E1b1b-V22   |
| ID141 | 13 | 24 | 16 | 11 | 14 | 15 | 12 | 13 | 11 | 31 | 17   | 15 | 18 | 11 | 15 | 18 | 18 | 10 | 30 | 11 | 13 | 21 | 10 | 0,0033 | I2-PH908    |
| ID142 | 14 | 21 | 14 | 10 | 13 | 16 | 11 | 12 | 11 | 29 | 18   | 15 | 21 | 11 | 14 | 15 | 17 | 10 | 21 | 13 | 10 | 20 | 12 | 0,0033 | G2a         |
| ID143 | 13 | 26 | 13 | 11 | 17 | 18 | 12 | 13 | 11 | 32 | 16   | 14 | 20 | 12 | 15 | 19 | 19 | 10 | 22 | 12 | 12 | 22 | 12 | 0,0033 | E-V13       |
| ID144 | 13 | 24 | 16 | 11 | 14 | 15 | 12 | 13 | 11 | 31 | 17   | 15 | 19 | 12 | 15 | 18 | 18 | 10 | 31 | 11 | 12 | 22 | 10 | 0,0033 | I2-PH908    |
| ID145 | 13 | 24 | 14 | 11 | 14 | 15 | 13 | 13 | 11 | 31 | 17   | 15 | 19 | 11 | 15 | 18 | 18 | 10 | 31 | 11 | 12 | 24 | 11 | 0,0066 | I2-PH908    |
| ID146 | 13 | 25 | 16 | 10 | 11 | 14 | 11 | 13 | 11 | 29 | 15   | 14 | 20 | 12 | 17 | 19 | 18 | 11 | 25 | 12 | 12 | 23 | 10 | 0,0033 | R1a-M458    |
| ID147 | 13 | 22 | 13 | 10 | 13 | 14 | 12 | 13 | 13 | 29 | 17   | 15 | 19 | 12 | 16 | 19 | 17 | 9  | 26 | 14 | 12 | 21 | 12 | 0,0033 | T-L131      |
| ID148 | 13 | 24 | 14 | 11 | 11 | 11 | 12 | 13 | 13 | 29 | 15   | 15 | 19 | 12 | 15 | 18 | 17 | 12 | 22 | 14 | 12 | 23 | 10 | 0,0033 | R1b-CTS9219 |
| ID149 | 13 | 24 | 16 | 10 | 14 | 16 | 13 | 13 | 11 | 31 | 17   | 15 | 20 | 11 | 15 | 18 | 19 | 10 | 31 | 11 | 12 | 24 | 10 | 0,0033 | I2a1b3      |
| ID150 | 13 | 24 | 13 | 10 | 14 | 19 | 12 | 12 | 11 | 29 | 17.2 | 14 | 20 | 10 | 15 | 18 | 17 | 10 | 26 | 12 | 11 | 22 | 9  | 0,0033 | J1          |
| ID151 | 13 | 24 | 13 | 10 | 16 | 18 | 12 | 13 | 11 | 30 | 15   | 14 | 20 | 11 | 17 | 16 | 20 | 10 | 22 | 13 | 12 | 22 | 11 | 0,0033 | E-V13       |
| ID152 | 13 | 24 | 14 | 11 | 11 | 11 | 12 | 13 | 13 | 29 | 15   | 15 | 19 | 13 | 15 | 18 | 17 | 12 | 22 | 13 | 12 | 23 | 10 | 0,0033 | R1b-CTS9219 |
| ID153 | 13 | 22 | 14 | 10 | 14 | 15 | 11 | 13 | 11 | 29 | 15   | 16 | 20 | 11 | 14 | 17 | 21 | 10 | 25 | 12 | 11 | 21 | 12 | 0,0033 | I1          |
| ID154 | 13 | 25 | 16 | 11 | 11 | 14 | 11 | 13 | 11 | 30 | 15   | 14 | 20 | 13 | 16 | 18 | 19 | 12 | 23 | 12 | 12 | 23 | 10 | 0,0033 | R1a         |
| ID155 | 13 | 24 | 16 | 10 | 14 | 15 | 12 | 13 | 11 | 30 | 18   | 15 | 19 | 10 | 15 | 18 | 18 | 10 | 29 | 11 | 13 | 23 | 10 | 0,0033 | I2-PH908    |
| ID156 | 13 | 24 | 17 | 12 | 14 | 15 | 13 | 13 | 11 | 31 | 17   | 15 | 19 | 11 | 15 | 18 | 18 | 10 | 30 | 11 | 12 | 23 | 10 | 0,0033 | I2a1b3      |
| ID157 | 13 | 24 | 16 | 11 | 14 | 15 | 13 | 13 | 11 | 31 | 18   | 15 | 19 | 11 | 15 | 18 | 18 | 10 | 32 | 11 | 12 | 22 | 10 | 0,0033 | I2-PH908    |
| ID158 | 13 | 23 | 14 | 10 | 14 | 14 | 11 | 12 | 11 | 28 | 16   | 16 | 20 | 11 | 14 | 17 | 19 | 10 | 25 | 12 | 11 | 22 | 13 | 0,0033 | I1          |
| ID159 | 13 | 25 | 16 | 10 | 11 | 13 | 11 | 13 | 11 | 29 | 16   | 14 | 20 | 12 | 17 | 17 | 19 | 11 | 25 | 11 | 13 | 23 | 10 | 0,0033 | R1a         |
| ID160 | 13 | 23 | 16 | 11 | 14 | 16 | 13 | 13 | 11 | 31 | 17   | 15 | 19 | 12 | 15 | 19 | 16 | 10 | 31 | 11 | 13 | 23 | 10 | 0,0033 | I2a1b3      |

|       |    |    |    |    |    |    |    |    |    |    |    |    |    |    |    |    |    |    |    |    |    |    |    |        |          |
|-------|----|----|----|----|----|----|----|----|----|----|----|----|----|----|----|----|----|----|----|----|----|----|----|--------|----------|
| ID161 | 12 | 23 | 15 | 10 | 15 | 19 | 12 | 12 | 12 | 28 | 15 | 14 | 19 | 12 | 14 | 18 | 18 | 9  | 23 | 12 | 11 | 21 | 9  | 0,0033 | J2b-M205 |
| ID162 | 13 | 24 | 13 | 10 | 16 | 18 | 12 | 13 | 11 | 30 | 15 | 14 | 20 | 12 | 15 | 17 | 21 | 10 | 22 | 12 | 12 | 22 | 12 | 0,0033 | E-V13    |
| ID163 | 13 | 25 | 15 | 10 | 11 | 14 | 11 | 13 | 11 | 30 | 16 | 14 | 20 | 12 | 18 | 19 | 18 | 11 | 25 | 12 | 12 | 23 | 10 | 0,0033 | R1a      |
| ID164 | 13 | 25 | 16 | 10 | 11 | 14 | 11 | 13 | 11 | 29 | 16 | 14 | 19 | 12 | 18 | 18 | 19 | 11 | 24 | 12 | 12 | 23 | 10 | 0,0033 | R1a      |
| ID165 | 13 | 24 | 13 | 10 | 16 | 18 | 12 | 13 | 11 | 30 | 15 | 14 | 20 | 13 | 16 | 17 | 21 | 10 | 22 | 11 | 12 | 22 | 13 | 0,0033 | E-V13    |
| ID166 | 13 | 24 | 13 | 10 | 16 | 18 | 11 | 14 | 11 | 31 | 15 | 14 | 20 | 12 | 17 | 18 | 19 | 10 | 21 | 12 | 12 | 23 | 12 | 0,0033 | E-V13    |
| ID167 | 13 | 25 | 15 | 10 | 11 | 14 | 11 | 13 | 11 | 29 | 18 | 14 | 20 | 12 | 17 | 18 | 18 | 11 | 25 | 12 | 12 | 23 | 10 | 0,0033 | R1a      |
| ID168 | 13 | 24 | 16 | 10 | 14 | 15 | 12 | 13 | 11 | 31 | 17 | 15 | 19 | 11 | 15 | 17 | 18 | 10 | 31 | 11 | 13 | 23 | 11 | 0,0033 | I2-PH908 |
| ID169 | 13 | 24 | 13 | 11 | 16 | 18 | 12 | 13 | 11 | 30 | 16 | 14 | 20 | 12 | 15 | 16 | 21 | 10 | 22 | 12 | 12 | 21 | 12 | 0,0033 | E-V13    |
| ID170 | 13 | 24 | 15 | 11 | 14 | 14 | 13 | 13 | 11 | 32 | 17 | 15 | 20 | 11 | 15 | 18 | 18 | 10 | 29 | 11 | 13 | 23 | 10 | 0,0033 | I2a1b3   |
| ID171 | 13 | 25 | 16 | 10 | 11 | 14 | 10 | 14 | 11 | 31 | 15 | 14 | 20 | 12 | 15 | 20 | 18 | 11 | 21 | 12 | 13 | 23 | 10 | 0,0033 | R1a      |
| ID172 | 13 | 24 | 13 | 10 | 16 | 17 | 12 | 13 | 11 | 31 | 18 | 14 | 20 | 12 | 17 | 19 | 18 | 10 | 23 | 12 | 12 | 22 | 12 | 0,0033 | E-V13    |
| ID173 | 12 | 24 | 14 | 10 | 13 | 13 | ?  | 14 | 11 | ?  | 17 | ?  | 20 | ?  | 15 | 19 | 16 | 9  | 23 | 12 | 12 | 21 | 10 | 0,0033 | J2a      |
| ID174 | 12 | 23 | 15 | 10 | 15 | 19 | 12 | 12 | 12 | 28 | 16 | 14 | 19 | 12 | 14 | 17 | 18 | 9  | 23 | 12 | 11 | 21 | 9  | 0,0033 | J2b-M205 |
| ID175 | 13 | 24 | 16 | 11 | 14 | 15 | 13 | 13 | 11 | 30 | 18 | 15 | 19 | 11 | 16 | 17 | 18 | 10 | 32 | 11 | 13 | 23 | 10 | 0,0033 | I2a1b3   |
| ID176 | 13 | 24 | 13 | 10 | 16 | 17 | 12 | 13 | 11 | 31 | 18 | 14 | 20 | 11 | 16 | 20 | 18 | 10 | 23 | 12 | 12 | 22 | 12 | 0,0033 | E-V13    |
| ID177 | 13 | 25 | 16 | 10 | 11 | 14 | 10 | 14 | 11 | 31 | 15 | 14 | 20 | 12 | 17 | 19 | 17 | 11 | 21 | 12 | 13 | 23 | 10 | 0,0033 | R1a      |
| ID178 | 13 | 24 | 13 | 10 | 16 | 17 | 12 | 13 | 11 | 31 | 17 | 14 | 20 | 11 | 16 | 20 | 19 | 10 | 24 | 13 | 13 | 22 | 12 | 0,0033 | E-V13    |
| ID179 | 12 | 23 | 14 | 10 | 13 | 18 | 11 | 14 | 11 | 30 | 13 | 15 | 21 | 11 | 15 | 16 | 14 | 9  | 22 | 13 | 12 | 21 | 11 | 0,0033 | J2a      |
| ID180 | 13 | 24 | 13 | 10 | 17 | 19 | 13 | 13 | 11 | 30 | 16 | 14 | 20 | 12 | 17 | 17 | 19 | 10 | 22 | 12 | 12 | 21 | 12 | 0,0033 | E-V13    |
| ID181 | 13 | 23 | 14 | 10 | 13 | 14 | 11 | 12 | 11 | 28 | 16 | 16 | 20 | 11 | 15 | 17 | 21 | 10 | 26 | 13 | 11 | 21 | 12 | 0,0033 | I1-Z63   |
| ID182 | 13 | 25 | 15 | 10 | 12 | 14 | 10 | 13 | 11 | 29 | 16 | 14 | 20 | 12 | 15 | 18 | 19 | 11 | 23 | 12 | 12 | 23 | 10 | 0,0033 | R1a-M458 |
| ID183 | 13 | 24 | 13 | 10 | 16 | 17 | 13 | 13 | 11 | 30 | 15 | 14 | 20 | 12 | 16 | 18 | 20 | 10 | 22 | 12 | 12 | 22 | 13 | 0,0033 | E-V13    |
| ID184 | 13 | 25 | 16 | 10 | 11 | 14 | 10 | 13 | 11 | 30 | 15 | 14 | 20 | 12 | 16 | 19 | 19 | 11 | 23 | 13 | 12 | 23 | 10 | 0,0033 | R1a      |
| ID185 | 13 | 24 | 14 | 10 | 17 | 18 | 12 | 13 | 11 | 30 | 15 | 14 | 20 | 12 | 15 | 17 | 19 | 10 | 22 | 12 | 12 | 21 | 0  | 0,0033 | E-V13    |
| ID186 | 14 | 24 | 13 | 10 | 16 | 18 | 12 | 13 | 11 | 30 | 15 | 14 | 20 | 12 | 17 | 17 | 21 | 10 | 22 | 12 | 12 | 21 | 13 | 0,0033 | E-V13    |
| ID187 | 13 | 24 | 16 | 11 | 14 | 15 | 12 | 13 | 11 | 29 | 18 | 15 | 19 | 11 | 15 | 18 | 18 | 10 | 31 | 11 | 13 | 23 | 10 | 0,0033 | I2-PH908 |
| ID188 | 13 | 25 | 13 | 10 | 16 | 17 | 12 | 13 | 11 | 30 | 16 | 14 | 20 | 12 | 17 | 20 | 20 | 10 | 22 | 12 | 12 | 22 | 12 | 0,0033 | E-V13    |
| ID189 | 13 | 24 | 13 | 10 | 16 | 17 | 12 | 13 | 11 | 31 | 17 | 14 | 20 | 12 | 16 | 18 | 18 | 10 | 23 | 12 | 12 | 22 | 12 | 0,0033 | E-V13    |
| ID190 | 13 | 25 | 13 | 10 | 16 | 19 | 12 | 14 | 11 | 31 | 16 | 14 | 19 | 12 | 16 | 19 | 20 | 10 | 22 | 12 | 12 | 21 | 12 | 0,0033 | E-V13    |
| ID191 | 13 | 22 | 15 | 11 | 13 | 14 | 12 | 13 | 11 | 29 | 18 | 16 | 21 | 12 | 16 | 18 | 18 | 10 | 22 | 12 | 10 | 21 | 10 | 0,0033 | G2a-L91  |
| ID192 | 12 | 23 | 15 | 10 | 15 | 18 | 12 | 12 | 12 | 28 | 16 | 14 | 19 | 12 | 14 | 17 | 17 | 9  | 23 | 12 | 11 | 21 | 9  | 0,0033 | J2b-M205 |
| ID193 | 13 | 23 | 14 | 10 | 13 | 15 | 11 | 12 | 11 | 28 | 15 | 17 | 20 | 12 | 14 | 17 | 22 | 10 | 26 | 12 | 11 | 22 | 11 | 0,0033 | I1       |

|       |    |      |    |    |    |    |    |    |    |    |      |    |    |    |    |    |    |    |    |    |    |    |    |        |             |
|-------|----|------|----|----|----|----|----|----|----|----|------|----|----|----|----|----|----|----|----|----|----|----|----|--------|-------------|
| ID194 | 13 | 24   | 14 | 11 | 14 | 16 | 14 | 13 | 11 | 31 | 17   | 14 | 19 | 11 | 15 | 17 | 18 | 10 | 30 | 11 | 13 | 23 | 10 | 0,0033 | I1-Z63      |
| ID195 | 13 | 24   | 15 | 10 | 11 | 14 | 11 | 13 | 13 | 29 | 18   | 15 | 19 | 11 | 15 | 17 | 18 | 13 | 22 | 13 | 12 | 23 | 10 | 0,0033 | R1b         |
| ID196 | 15 | 22   | 15 | 10 | 16 | 17 | 10 | 13 | 12 | 29 | 17   | 14 | 20 | 11 | 14 | 19 | 21 | 10 | 25 | 13 | 12 | 21 | 12 | 0,0033 | I2-M223     |
| ID197 | 13 | 24   | 17 | 10 | 14 | 15 | 12 | 13 | 11 | 30 | 18   | 14 | 19 | 11 | 15 | 18 | 18 | 10 | 31 | 11 | 13 | 23 | 11 | 0,0033 | I2-PH908    |
| ID198 | 13 | 24   | 16 | 11 | 14 | 17 | 12 | 13 | 11 | 31 | 17   | 14 | 19 | 11 | 15 | 18 | 18 | 10 | 29 | 11 | 14 | 23 | 10 | 0,0033 | I2-PH908    |
| ID199 | 13 | 25   | 16 | 11 | 14 | 15 | 13 | 13 | 11 | 31 | 17   | 15 | 20 | 11 | 15 | 17 | 18 | 10 | 31 | 11 | 12 | 23 | 10 | 0,0033 | I2a1b3      |
| ID200 | 13 | 23   | 15 | 10 | 15 | 20 | 12 | 12 | 12 | 28 | 15   | 14 | 19 | 12 | 14 | 19 | 18 | 9  | 23 | 13 | 11 | 21 | 9  | 0,0033 | J2b-M205    |
| ID201 | 13 | 24   | 16 | 10 | 14 | 15 | 12 | 13 | 11 | 31 | 17   | 15 | 20 | 11 | 15 | 19 | 18 | 10 | 31 | 11 | 13 | 23 | 10 | 0,0033 | I2a1b3      |
| ID202 | 13 | 24   | 13 | 10 | 16 | 19 | 9  | 13 | 11 | 30 | 17   | 14 | 19 | 12 | 17 | 20 | 19 | 10 | 22 | 12 | 12 | 21 | 12 | 0,0033 | E-V13       |
| ID203 | 13 | 25   | 16 | 11 | 11 | 14 | 10 | 14 | 11 | 31 | 15   | 14 | 20 | 13 | 16 | 17 | 19 | 11 | 23 | 11 | 12 | 23 | 10 | 0,0033 | R1a         |
| ID204 | 13 | 23   | 14 | 10 | 13 | 14 | 11 | 12 | 11 | 28 | 15   | 16 | 20 | 12 | 14 | 19 | 21 | 10 | 25 | 12 | 11 | 22 | 11 | 0,0033 | I1-P109     |
| ID205 | 13 | 24   | 13 | 10 | 16 | 18 | 11 | 13 | 11 | 31 | 16   | 14 | 20 | 12 | 15 | 17 | 21 | 10 | 23 | 12 | 12 | 23 | 13 | 0,0033 | E-V13       |
| ID206 | 13 | 24   | 13 | 10 | 16 | 17 | 12 | 13 | 11 | 30 | 15   | 14 | 20 | 12 | 16 | 18 | 20 | 10 | 22 | 12 | 12 | 22 | 13 | 0,0033 | E-V13       |
| ID207 | 13 | 24   | 16 | 10 | 14 | 15 | 13 | 13 | 11 | 31 | 17   | 15 | 19 | 11 | 15 | 18 | 18 | 10 | 28 | 11 | 13 | 23 | 11 | 0,0033 | I2-PH908    |
| ID208 | 13 | 24   | 15 | 11 | 14 | 15 | 13 | 13 | 11 | 31 | 17   | 14 | 19 | 11 | 15 | 17 | 18 | 10 | 30 | 11 | 13 | 23 | 10 | 0,0033 | I2-PH908    |
| ID209 | 13 | 24   | 17 | 11 | 14 | 15 | 13 | 13 | 11 | 30 | 17   | 15 | 19 | 12 | 15 | 18 | 18 | 10 | 29 | 11 | 12 | 22 | 11 | 0,0033 | I2-PH908    |
| ID210 | 13 | 24   | 14 | 10 | 16 | 17 | 12 | 13 | 11 | 31 | 17   | 14 | 20 | 12 | 16 | 19 | 18 | 10 | 23 | 12 | 12 | 23 | 12 | 0,0033 | E-V13       |
| ID211 | 13 | 24   | 17 | 11 | 14 | 15 | 12 | 13 | 11 | 30 | 17   | 15 | 19 | 11 | 15 | 18 | 17 | 10 | 31 | 11 | 13 | 22 | 10 | 0,0033 | I2-PH908    |
| ID212 | 13 | 24   | 13 | 10 | 14 | 20 | 12 | 12 | 11 | 29 | 17.2 | 14 | 20 | 10 | 15 | 18 | 17 | 10 | 25 | 12 | 11 | 22 | 9  | 0,0033 | J2-PF7263   |
| ID213 | 13 | 24   | 16 | 11 | 13 | 16 | 13 | 13 | 11 | 31 | 17   | 15 | 18 | 11 | 15 | 18 | 18 | 10 | 31 | 11 | 12 | 23 | 10 | 0,0033 | I2-PH908    |
| ID214 | 12 | 23   | 15 | 10 | 15 | 19 | 12 | 12 | 12 | 28 | 16   | 14 | 19 | 12 | 14 | 18 | 19 | 9  | 23 | 12 | 11 | 21 | 9  | 0,0033 | J2b-M205    |
| ID215 | 13 | 24   | 16 | 10 | 14 | 15 | 13 | 14 | 11 | 32 | 17   | 15 | 19 | 11 | 15 | 18 | 18 | 10 | 31 | 11 | 12 | 23 | 10 | 0,0033 | I2-PH908    |
| ID216 | 13 | 23   | 14 | 10 | 13 | 14 | 11 | 12 | 11 | 28 | 15   | 17 | 20 | 12 | 14 | 18 | 21 | 10 | 25 | 12 | 11 | 23 | 11 | 0,0033 | I1-P109     |
| ID217 | 13 | 23   | 14 | 10 | 13 | 14 | 11 | 12 | 11 | 29 | 15   | 17 | 20 | 12 | 14 | 17 | 21 | 10 | 25 | 12 | 11 | 22 | 11 | 0,0033 | I1-P109     |
| ID218 | 12 | 23   | 15 | 10 | 15 | 19 | 12 | 12 | 12 | 28 | 16   | 14 | 19 | 12 | 14 | 17 | 18 | 9  | 21 | 12 | 11 | 21 | 9  | 0,0033 | J2b-M205    |
| ID219 | 12 | 24   | 15 | 11 | 11 | 15 | 12 | 13 | 13 | 30 | 17   | 15 | 19 | 12 | 16 | 19 | 17 | 12 | 22 | 12 | 12 | 23 | 10 | 0,0033 | R1b         |
| ID220 | 13 | 25   | 16 | 11 | 14 | 15 | 12 | 13 | 11 | 31 | 18   | 15 | 19 | 11 | 15 | 18 | 18 | 10 | 31 | 11 | 13 | 24 | 11 | 0,0033 | I2-PH908    |
| ID221 | 13 | 24   | 14 | 11 | 11 | 11 | 12 | 13 | 13 | 29 | 16   | 15 | 19 | 12 | 15 | 19 | 17 | 12 | 23 | 14 | 12 | 23 | 10 | 0,0033 | R1b-CTS9219 |
| ID222 | 13 | 24   | 13 | 10 | 16 | 18 | 11 | 14 | 11 | 31 | 14   | 14 | 20 | 12 | 16 | 18 | 19 | 10 | 22 | 12 | 12 | 23 | 12 | 0,0033 | E-V13       |
| ID223 | 14 | 24.3 | 14 | 10 | 11 | 16 | 12 | 14 | 14 | 29 | 18   | 14 | 20 | 11 | 14 | 17 | 18 | 10 | 24 | 12 | 12 | 21 | 11 | 0,0033 | N-P189.2    |
| ID224 | 13 | 25   | 13 | 10 | 16 | 18 | 12 | 13 | 11 | 29 | 16   | 14 | 20 | 12 | 18 | 17 | 19 | 10 | 22 | 12 | 12 | 22 | 13 | 0,0033 | E-V13       |
| ID225 | 13 | 24   | 14 | 11 | 11 | 11 | 12 | 14 | 13 | 30 | 16   | 15 | 19 | 11 | 15 | 17 | 16 | 12 | 22 | 13 | 12 | 23 | 10 | 0,0033 | R1b-CTS9219 |
| ID226 | 13 | 24   | 16 | 11 | 14 | 15 | 13 | 13 | 11 | 31 | 18   | 14 | 20 | 11 | 15 | 18 | 17 | 10 | 29 | 11 | 12 | 24 | 10 | 0,0033 | I2a1b3      |

|       |    |      |    |    |    |    |    |    |    |    |    |    |    |    |    |    |      |    |    |    |    |    |    |        |          |
|-------|----|------|----|----|----|----|----|----|----|----|----|----|----|----|----|----|------|----|----|----|----|----|----|--------|----------|
| ID227 | 13 | 24   | 13 | 11 | 16 | 18 | 12 | 13 | 11 | 30 | 15 | 14 | 20 | 12 | 15 | 17 | 19   | 10 | 22 | 12 | 12 | 21 | 13 | 0,0033 | E-V13    |
| ID228 | 12 | 24   | 15 | 10 | 14 | 17 | 12 | 12 | 11 | 28 | 16 | 16 | 19 | 11 | 13 | 16 | 17   | 9  | 21 | 13 | 12 | 21 | 9  | 0,0033 | J2b-M241 |
| ID229 | 14 | 24.3 | 14 | 11 | 11 | 16 | 13 | 14 | 14 | 29 | 18 | 14 | 20 | 12 | 14 | 17 | 18   | 10 | 24 | 12 | 12 | 21 | 11 | 0,0033 | N-P189.2 |
| ID230 | 12 | 23   | 15 | 10 | 15 | 19 | 12 | 12 | 13 | 28 | 16 | 14 | 19 | 12 | 14 | 19 | 18   | 9  | 23 | 12 | 11 | 21 | 9  | 0,0033 | J2b-M205 |
| ID231 | 13 | 25   | 16 | 10 | 11 | 14 | 11 | 13 | 11 | 29 | 16 | 14 | 20 | 12 | 17 | 18 | 18   | 11 | 25 | 12 | 12 | 23 | 10 | 0,0033 | R1a-M458 |
| ID232 | 13 | 22   | 15 | 10 | 14 | 14 | 12 | 12 | 11 | 29 | 16 | 16 | 21 | 11 | 15 | 16 | 18   | 10 | 21 | 11 | 9  | 20 | 12 | 0,0033 | G2a-L497 |
| ID233 | 13 | 23   | 13 | 10 | 16 | 18 | 11 | 14 | 11 | 31 | 15 | 14 | 20 | 12 | 15 | 18 | 19   | 10 | 22 | 12 | 12 | 23 | 12 | 0,0033 | E-V13    |
| ID234 | 13 | 24   | 16 | 10 | 14 | 15 | 12 | 13 | 11 | 31 | 16 | 15 | 19 | 11 | 15 | 18 | 19   | 10 | 31 | 11 | 13 | 23 | 10 | 0,0033 | I2-PH908 |
| ID235 | 14 | 24.3 | 14 | 10 | 11 | 16 | 12 | 14 | 14 | 29 | 18 | 14 | 20 | 12 | 14 | 17 | 18   | 10 | 24 | 13 | 12 | 21 | 11 | 0,0033 | N-P189.2 |
| ID236 | 13 | 24   | 13 | 10 | 16 | 18 | 12 | 13 | 11 | 31 | 16 | 14 | 20 | 12 | 15 | 17 | 20   | 11 | 22 | 12 | 12 | 22 | 12 | 0,0033 | E-V13    |
| ID237 | 13 | 23   | 14 | 10 | 13 | 14 | 12 | 12 | 11 | 28 | 15 | 16 | 20 | 11 | 14 | 16 | 21   | 10 | 26 | 11 | 11 | 21 | 12 | 0,0033 | I1-P109  |
| ID238 | 13 | 24   | 16 | 11 | 13 | 15 | 12 | 13 | 11 | 31 | 18 | 15 | 19 | 11 | 15 | 18 | 18   | 10 | 28 | 11 | 13 | 23 | 10 | 0,0033 | I2-PH908 |
| ID239 | 13 | 24   | 13 | 10 | 16 | 17 | 12 | 13 | 11 | 30 | 15 | 14 | 20 | 12 | 16 | 18 | 20.2 | 10 | 22 | 12 | 12 | 22 | 11 | 0,0033 | E-V13    |
| ID240 | 13 | 24   | 13 | 10 | 16 | 18 | 11 | 13 | 11 | 31 | 16 | 15 | 20 | 12 | 15 | 17 | 22   | 10 | 22 | 12 | 12 | 23 | 13 | 0,0033 | E-V13    |
| ID241 | 13 | 24   | 16 | 10 | 14 | 15 | 10 | 13 | 11 | 31 | 17 | 15 | 19 | 11 | 15 | 18 | 18   | 10 | 31 | 11 | 12 | 21 | 10 | 0,0033 | I2-PH908 |
| ID242 | 13 | 25   | 16 | 11 | 13 | 14 | 10 | 13 | 11 | 30 | 17 | 14 | 20 | 13 | 15 | 17 | 19   | 11 | 23 | 12 | 12 | 23 | 10 | 0,0033 | R1a      |
| ID243 | 13 | 24   | 17 | 11 | 11 | 14 | 10 | 13 | 11 | 29 | 13 | 14 | 20 | 12 | ?  | 18 | 18   | 11 | 24 | 13 | 12 | 24 | 10 | 0,0033 | R1a      |
| ID244 | 13 | 24   | 16 | 11 | 14 | 15 | 12 | 13 | 11 | 31 | 17 | 15 | 20 | 10 | 15 | 19 | 18   | 10 | 29 | 11 | 12 | 24 | 10 | 0,0033 | I2a1b3   |
| ID245 | 13 | 24   | 17 | 11 | 14 | 15 | 13 | 13 | 11 | 30 | 16 | 15 | 19 | 11 | 15 | 18 | 18   | 10 | 30 | 11 | 12 | 23 | 10 | 0,0033 | I2-PH908 |
| ID246 | 13 | 24   | 16 | 11 | 14 | 15 | 12 | 13 | 11 | 31 | 17 | 15 | 19 | 11 | 15 | 18 | 18   | 10 | 33 | 11 | 13 | 23 | 10 | 0,0033 | I2-PH908 |
| ID247 | 13 | 24   | 16 | 11 | 14 | 15 | 12 | 13 | 11 | 31 | 19 | 15 | 19 | 11 | 15 | 19 | 17   | 10 | 31 | 11 | 12 | 23 | 10 | 0,0033 | I2-PH908 |
| ID248 | 13 | 25   | 16 | 11 | 14 | 15 | 12 | 13 | 11 | 32 | 17 | 15 | 20 | 11 | 15 | 18 | 19   | 10 | 31 | 12 | 13 | 23 | 10 | 0,0033 | I2a1b3   |
| ID249 | 14 | 24.3 | 14 | 10 | 11 | 16 | 12 | 14 | 14 | 29 | 18 | 14 | 20 | 12 | 14 | 19 | 18   | 10 | 24 | 12 | 12 | 21 | 11 | 0,0033 | N-P189.2 |
| ID250 | 13 | 24   | 13 | 10 | 16 | 17 | 13 | 13 | 11 | 30 | 16 | 14 | 20 | 12 | 17 | 18 | 20   | 10 | 22 | 12 | 12 | 21 | 13 | 0,0033 | E-V13    |
| ID251 | 13 | 24   | 16 | 11 | 14 | 15 | 12 | 13 | 11 | 31 | 18 | 15 | 19 | 11 | 15 | 17 | 18   | 10 | 31 | 11 | 12 | 22 | 10 | 0,0033 | I2-PH908 |
| ID252 | 13 | 23   | 15 | 10 | 13 | 14 | 11 | 12 | 11 | 28 | 15 | 17 | 20 | 12 | 14 | 18 | 21   | 10 | 25 | 12 | 11 | 22 | 11 | 0,0033 | I1-P109  |
| ID253 | 12 | 22   | 14 | 10 | 14 | 17 | 11 | 13 | 11 | 29 | 15 | 14 | 21 | 12 | 15 | 17 | 18   | 10 | 23 | 13 | 12 | 22 | 8  | 0,0033 | J2a-M92  |
| ID254 | 13 | 24   | 13 | 10 | 16 | 17 | 12 | 13 | 11 | 31 | 17 | 14 | 20 | 12 | 16 | 21 | 19   | 10 | 23 | 12 | 12 | 22 | 12 | 0,0033 | E-V13    |
| ID255 | 13 | 23   | 13 | 10 | 16 | 18 | 13 | 13 | 11 | 30 | 16 | 14 | 20 | 12 | 17 | 18 | 20   | 10 | 22 | 12 | 12 | 23 | 13 | 0,0033 | E-V13    |
| ID256 | 13 | 23   | 13 | 11 | 16 | 18 | 11 | 13 | 11 | 30 | 16 | 14 | 20 | 12 | 15 | 17 | 21   | 10 | 22 | 12 | 12 | 21 | 12 | 0,0033 | E-V13    |
| ID257 | 12 | 23   | 15 | 10 | 16 | 20 | 12 | 12 | 13 | 28 | 16 | 14 | 19 | 12 | 14 | 17 | 19   | 9  | 23 | 12 | 11 | 21 | 9  | 0,0033 | J2b-M205 |
| ID258 | 13 | 24   | 15 | 11 | 14 | 15 | 12 | 13 | 11 | 32 | 17 | 14 | 20 | 11 | 15 | 18 | 17   | 10 | 29 | 11 | 13 | 23 | 10 | 0,0033 | I2a1b3   |
| ID259 | 13 | 24   | 15 | 11 | 14 | 15 | 13 | 13 | 11 | 31 | 17 | 15 | 19 | 11 | 15 | 17 | 19   | 10 | 31 | 11 | 13 | 23 | 10 | 0,0033 | I2-PH908 |



|       |    |      |    |    |    |    |    |    |    |    |    |    |    |    |    |    |    |    |    |    |    |    |    |        |             |
|-------|----|------|----|----|----|----|----|----|----|----|----|----|----|----|----|----|----|----|----|----|----|----|----|--------|-------------|
| ID260 | 12 | 23   | 16 | 11 | 14 | 16 | 12 | 13 | 11 | 31 | 17 | 15 | 19 | 11 | 15 | 18 | 16 | 10 | 31 | 11 | 13 | 23 | 10 | 0,0033 | I2-PH908    |
| ID261 | 15 | 23   | 14 | 11 | 11 | 15 | 10 | 14 | 16 | 30 | 17 | 14 | 19 | 12 | 14 | 17 | 18 | 11 | 21 | 12 | 11 | 22 | 11 | 0,0033 | R1a         |
| ID262 | 13 | 24   | 16 | 11 | 14 | 15 | 13 | 13 | 11 | 30 | 17 | 15 | 19 | 11 | 15 | 18 | 18 | 10 | 29 | 11 | 13 | 23 | 10 | 0,0033 | I2-PH908    |
| ID263 | 13 | 24   | 15 | 11 | 14 | 15 | 12 | 13 | 11 | 31 | 18 | 14 | 20 | 11 | 15 | 19 | 18 | 10 | 30 | 11 | 13 | 22 | 10 | 0,0033 | I2a1b3      |
| ID264 | 13 | 24   | 16 | 11 | 14 | 17 | 13 | 13 | 11 | 31 | 15 | 15 | 19 | 13 | 15 | 18 | 17 | 10 | 29 | 11 | 12 | 21 | 10 | 0,0033 | I2a1b3      |
| ID265 | 15 | 24   | 13 | 9  | 12 | 18 | 12 | 13 | 11 | 30 | 17 | 14 | 21 | 11 | 15 | 16 | 19 | 10 | 27 | 14 | 11 | 22 | 12 | 0,0033 | E1b1b-M123  |
| ID266 | 13 | 24   | 16 | 10 | 14 | 15 | 15 | 13 | 11 | 31 | 17 | 15 | 19 | 11 | 16 | 17 | 17 | 10 | 30 | 11 | 12 | 24 | 10 | 0,0033 | I2-PH908    |
| ID267 | 13 | 25   | 16 | 10 | 11 | 14 | 10 | 13 | 11 | 30 | 16 | 14 | 20 | 12 | 17 | 18 | 17 | 11 | 21 | 12 | 12 | 23 | 10 | 0,0033 | R1a         |
| ID268 | 13 | 25   | 16 | 11 | 14 | 15 | 10 | 13 | 11 | 30 | 17 | 14 | 20 | 13 | 15 | 17 | 19 | 11 | 23 | 12 | 12 | 23 | 10 | 0,0033 | R1a         |
| ID269 | 13 | 24   | 13 | 10 | 16 | 18 | 11 | 14 | 11 | 31 | 15 | 14 | 20 | 11 | 17 | 19 | 19 | 10 | 22 | 12 | 12 | 23 | 12 | 0,0033 | E-V13       |
| ID270 | 13 | 25   | 16 | 10 | 11 | 14 | 11 | 13 | 11 | 29 | 16 | 14 | 20 | 12 | 17 | 19 | 19 | 11 | 25 | 12 | 12 | 23 | 10 | 0,0033 | I2a1b3      |
| ID271 | 13 | 24   | 15 | 11 | 14 | 15 | 12 | 13 | 11 | 32 | 17 | 15 | 20 | 11 | 15 | 19 | 21 | 10 | 29 | 12 | 13 | 24 | 10 | 0,0033 | I2a1b3      |
| ID272 | 13 | 24   | 13 | 11 | 16 | 18 | 11 | 13 | 11 | 30 | 16 | 14 | 20 | 12 | 15 | 17 | 20 | 10 | 22 | 12 | 12 | 21 | 12 | 0,0033 | E-V13       |
| ID273 | 13 | 24   | 16 | 10 | 11 | 14 | 11 | 13 | 11 | 29 | 15 | 14 | 20 | 13 | 16 | 17 | 19 | 11 | 23 | 12 | 12 | 23 | 10 | 0,0033 | R1a         |
| ID274 | 13 | 24   | 13 | 10 | 16 | 18 | 11 | 13 | 11 | 31 | 16 | 14 | 20 | 12 | 15 | 16 | 22 | 10 | 22 | 12 | 12 | 23 | 13 | 0,0033 | E-V13       |
| ID275 | 13 | 24   | 13 | 11 | 16 | 18 | 11 | 13 | 11 | 30 | 16 | 14 | 20 | 12 | 15 | 18 | 21 | 10 | 22 | 12 | 12 | 21 | 12 | 0,0033 | E-V13       |
| ID276 | 13 | 24   | 14 | 11 | 11 | 11 | 13 | 13 | 13 | 29 | 13 | 15 | 19 | 11 | 15 | 17 | 17 | 12 | 22 | 14 | 12 | 23 | 10 | 0,0033 | R1b-CTS9219 |
| ID277 | 13 | 24   | 16 | 11 | 14 | 15 | 13 | 13 | 11 | 31 | 18 | 15 | 19 | 11 | 15 | 19 | 18 | 10 | 31 | 11 | 12 | 23 | 10 | 0,0033 | I2-PH908    |
| ID278 | 12 | 23   | 15 | 9  | 15 | 19 | 14 | 12 | 12 | 29 | 16 | 14 | 19 | 12 | 14 | 18 | 18 | 9  | 23 | 11 | 11 | 21 | 9  | 0,0033 | J2b-M205    |
| ID279 | 13 | 24   | 15 | 11 | 15 | 15 | 13 | 13 | 11 | 30 | 19 | 15 | 19 | 11 | 14 | 18 | 19 | 10 | 30 | 11 | 12 | 22 | 10 | 0,0033 | I2-PH908    |
| ID280 | 13 | 24   | 16 | 10 | 12 | 14 | 10 | 13 | 11 | 30 | 15 | 14 | 20 | 11 | 15 | 17 | 20 | 11 | 23 | 12 | 12 | 23 | 11 | 0,0033 | R1a         |
| ID281 | 13 | 24   | 13 | 10 | 16 | 18 | 11 | 14 | 11 | 31 | 15 | 14 | 20 | 12 | 15 | 18 | 20 | 10 | 22 | 12 | 12 | 23 | 12 | 0,0033 | E-V13       |
| ID282 | 13 | 24   | 16 | 11 | 14 | 15 | 11 | 13 | 11 | 30 | 16 | 14 | 19 | 11 | 15 | 18 | 18 | 10 | 31 | 11 | 13 | 22 | 11 | 0,0033 | I2-PH908    |
| ID283 | 12 | 23   | 14 | 10 | 11 | 17 | 13 | 15 | 11 | 32 | 17 | 15 | 21 | 12 | 15 | 21 | 17 | 9  | 22 | 12 | 10 | 21 | 10 | 0,0033 | J2a         |
| ID284 | 13 | 24   | 14 | 11 | 15 | 15 | 13 | 13 | 11 | 31 | 17 | 15 | 19 | 11 | 15 | 18 | 18 | 10 | 31 | 11 | 12 | 24 | 11 | 0,0033 | I2-PH908    |
| ID285 | 14 | 24.3 | 14 | 10 | 11 | 16 | 12 | 14 | 14 | 28 | 18 | 14 | 20 | 12 | 14 | 17 | 18 | 10 | 24 | 12 | 12 | 21 | 11 | 0,0033 | N-P189.2    |
| ID286 | 12 | 23   | 15 | 10 | 15 | 19 | 12 | 12 | 12 | 28 | 16 | 14 | 19 | 12 | 14 | 18 | 18 | 9  | 24 | 12 | 11 | 21 | 9  | 0,0033 | J2b-M205    |
| ID287 | 13 | 24   | 16 | 11 | 15 | 15 | 12 | 13 | 11 | 31 | 17 | 15 | 19 | 11 | 15 | 17 | 18 | 10 | 31 | 11 | 12 | 23 | 10 | 0,0033 | I2-PH908    |
| ID288 | 13 | 24   | 15 | 10 | 13 | 15 | 13 | 13 | 11 | 31 | 17 | 15 | 19 | 11 | 15 | 18 | 18 | 10 | 31 | 11 | 13 | 23 | 10 | 0,0033 | I2-PH908    |
| ID289 | 13 | 24   | 13 | 10 | 16 | 18 | 12 | 13 | 11 | 30 | 16 | 14 | 21 | 12 | 17 | 17 | 20 | 10 | 22 | 12 | 14 | 22 | 12 | 0,0033 | E-V13       |
| ID290 | 13 | 24   | 14 | 11 | 11 | 11 | 13 | 13 | 13 | 29 | 15 | 15 | 19 | 12 | 15 | 17 | 17 | 12 | 22 | 14 | 12 | 23 | 10 | 0,0066 | R1b-CTS9219 |
| ID291 | 13 | 23   | 14 | 10 | 13 | 14 | 11 | 12 | 11 | 28 | 15 | 16 | 19 | 12 | 14 | 17 | 20 | 10 | 26 | 12 | 11 | 22 | 11 | 0,0033 | I1-P109     |
